# Supplementary material
Source: PubMed Central journal article supplement (PMC5906740)

**C57BL/6**

**BALB/c**

**Animal #1**

**Animal #2**

**Animal #3**

**Animal #4**

**Tibialis Anterior**

**Gastrocnemius**

**Tibialis Anterior**

**Gastrocnemius**

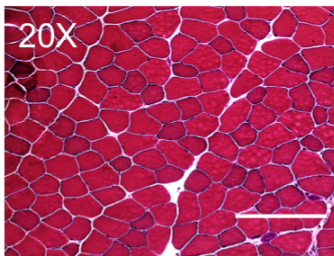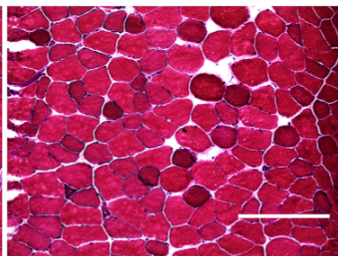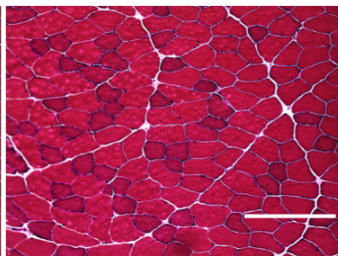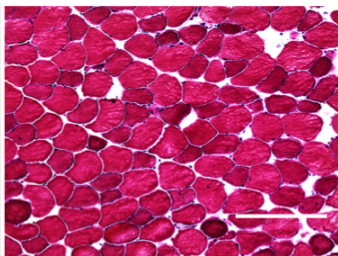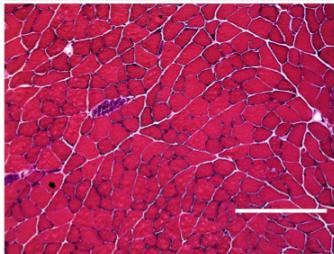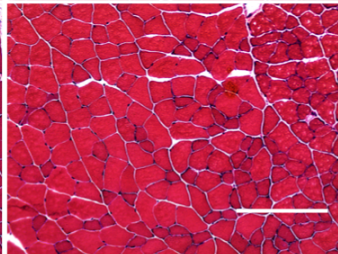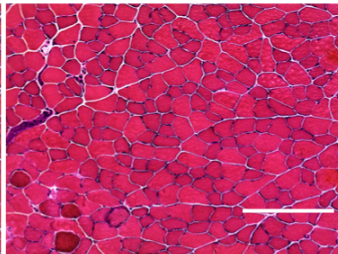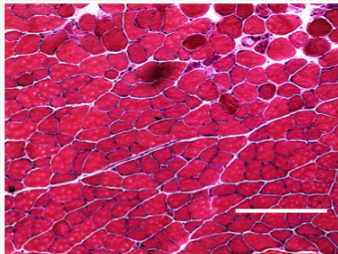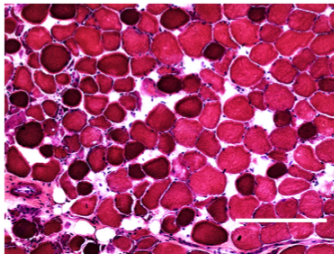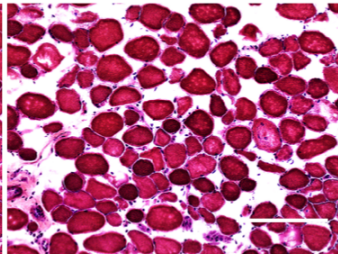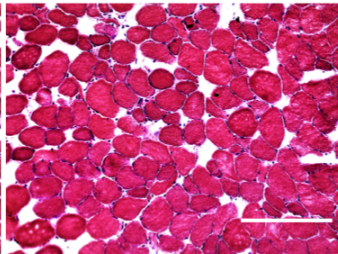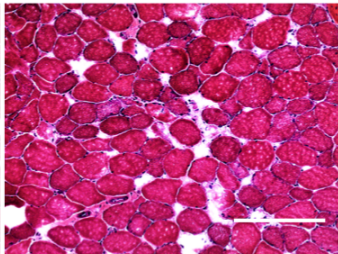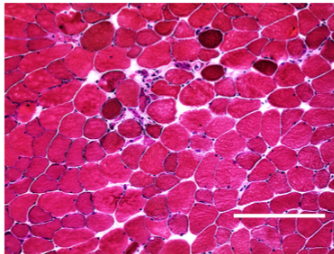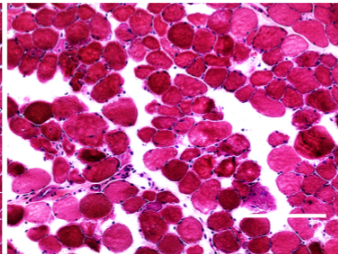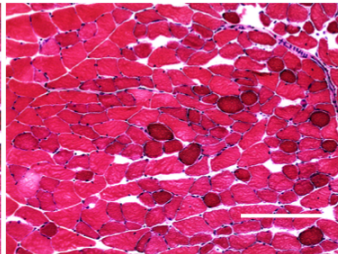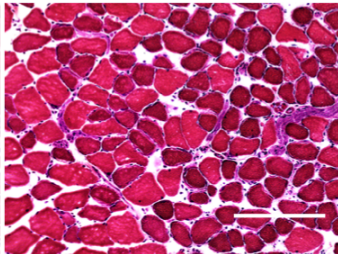

Supplement: mmc3.pdf [file mmc3.pdf]
