# Supplementary material
Source: PubMed Central journal article supplement (PMC5906740)

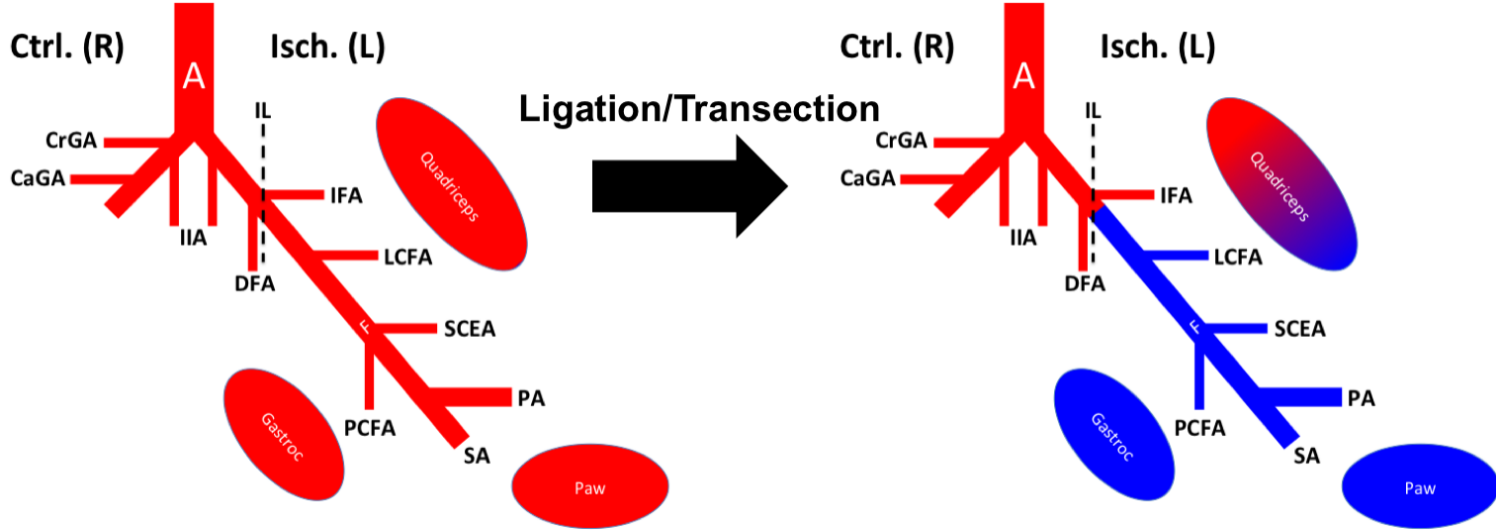

Supplement: mmc1.pdf [file mmc1.pdf]

Markers of Ischemic Tissue Damage

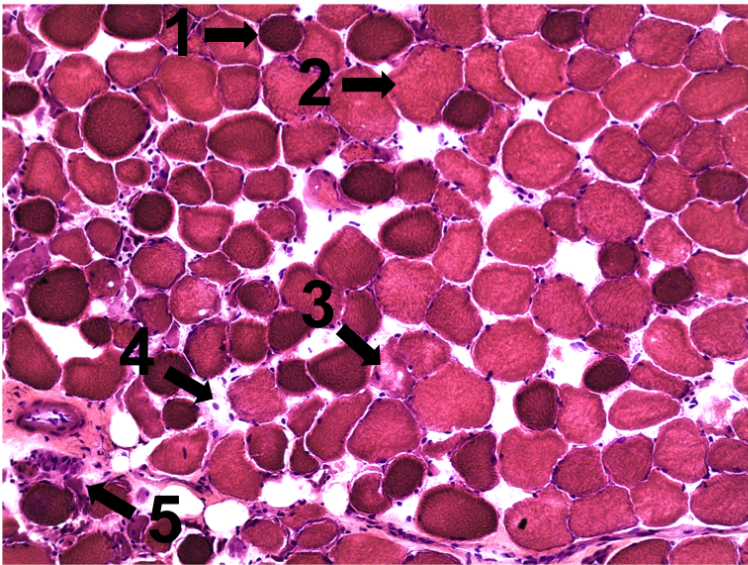

No markers of Ischemic Tissue Damage

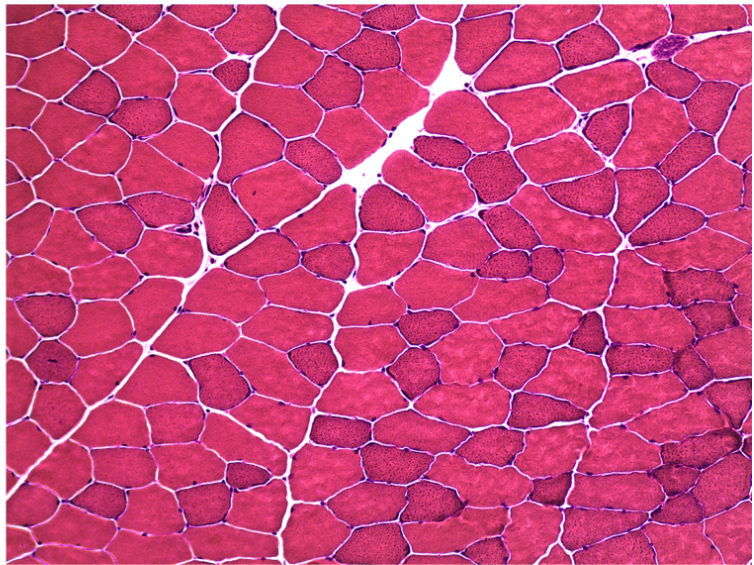

Supplement: mmc2.pdf [file mmc2.pdf]

**A**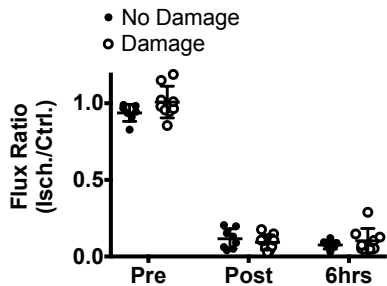**B**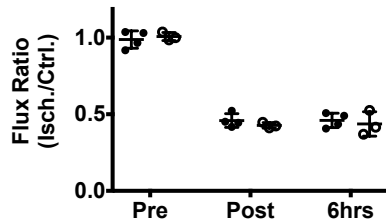**C**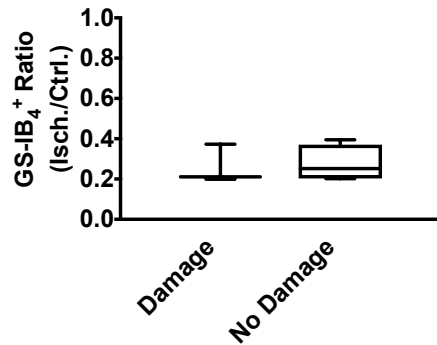**D**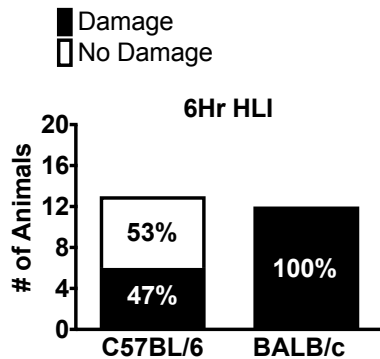**E**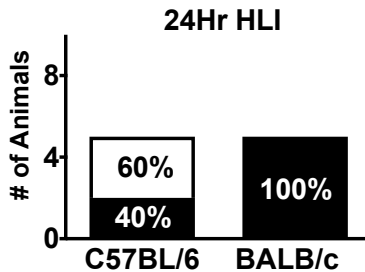**F**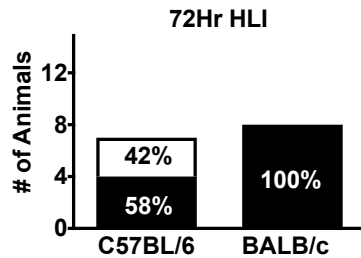

Supplement: mmc4.pdf [file mmc4.pdf]

Isch. (L)

Ctrl. (R)

Animal #1

Animal #2

Animal #3

Animal #4

20X

C57BL/6

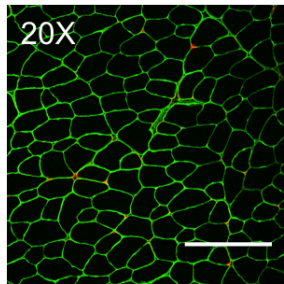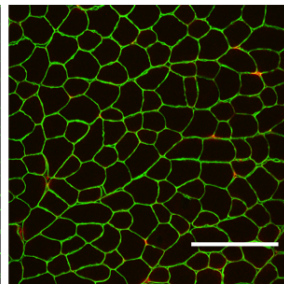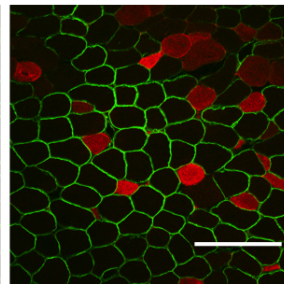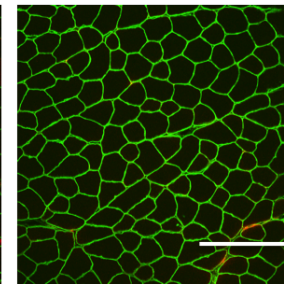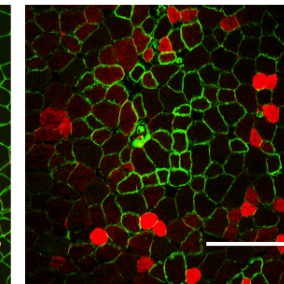

BALB/c

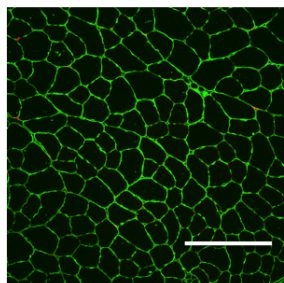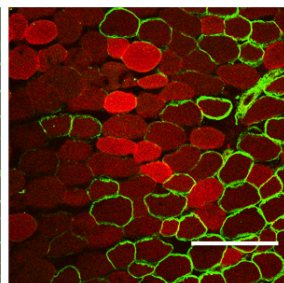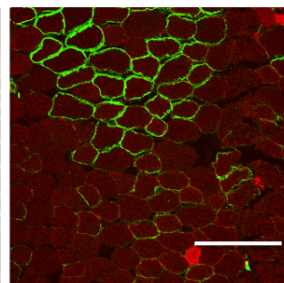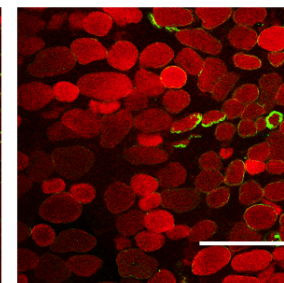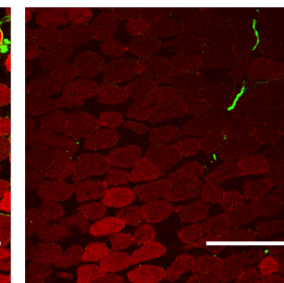

Dystrophin; Evans Blue Dye

Supplement: mmc5.pdf [file mmc5.pdf]

**A**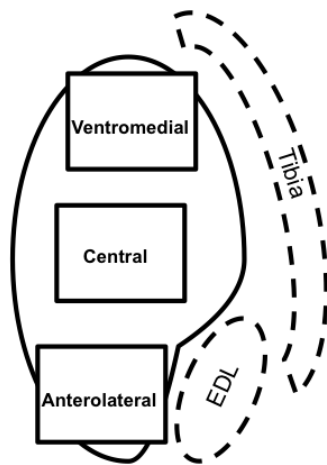

Left Tibialis Anterior

**B**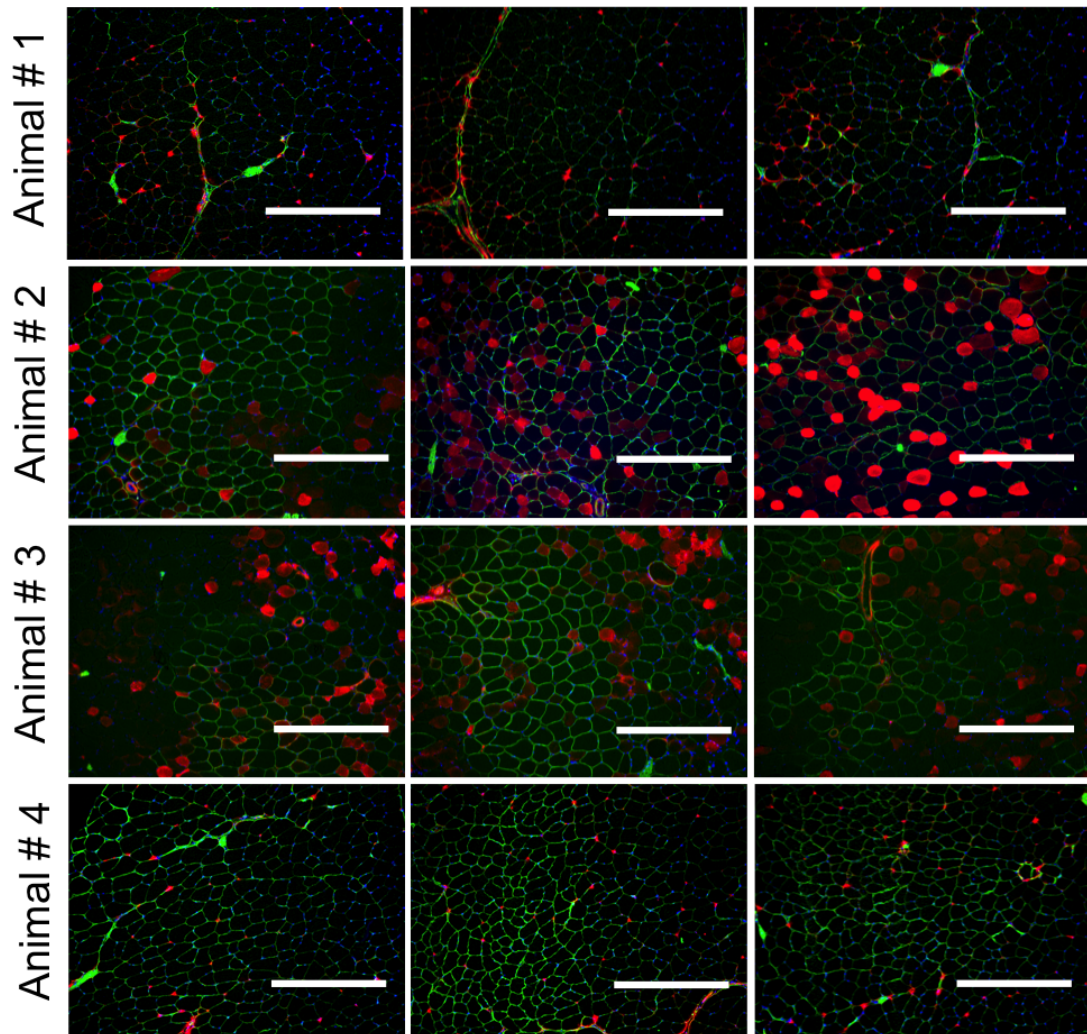

Dapi; Dystrophin; Evans Blue Dye

Supplement: mmc6.pdf [file mmc6.pdf]

**A**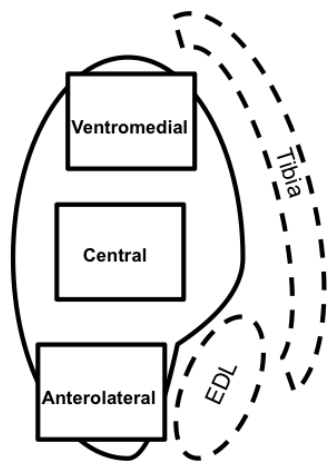

Left Tibialis Anterior

**B**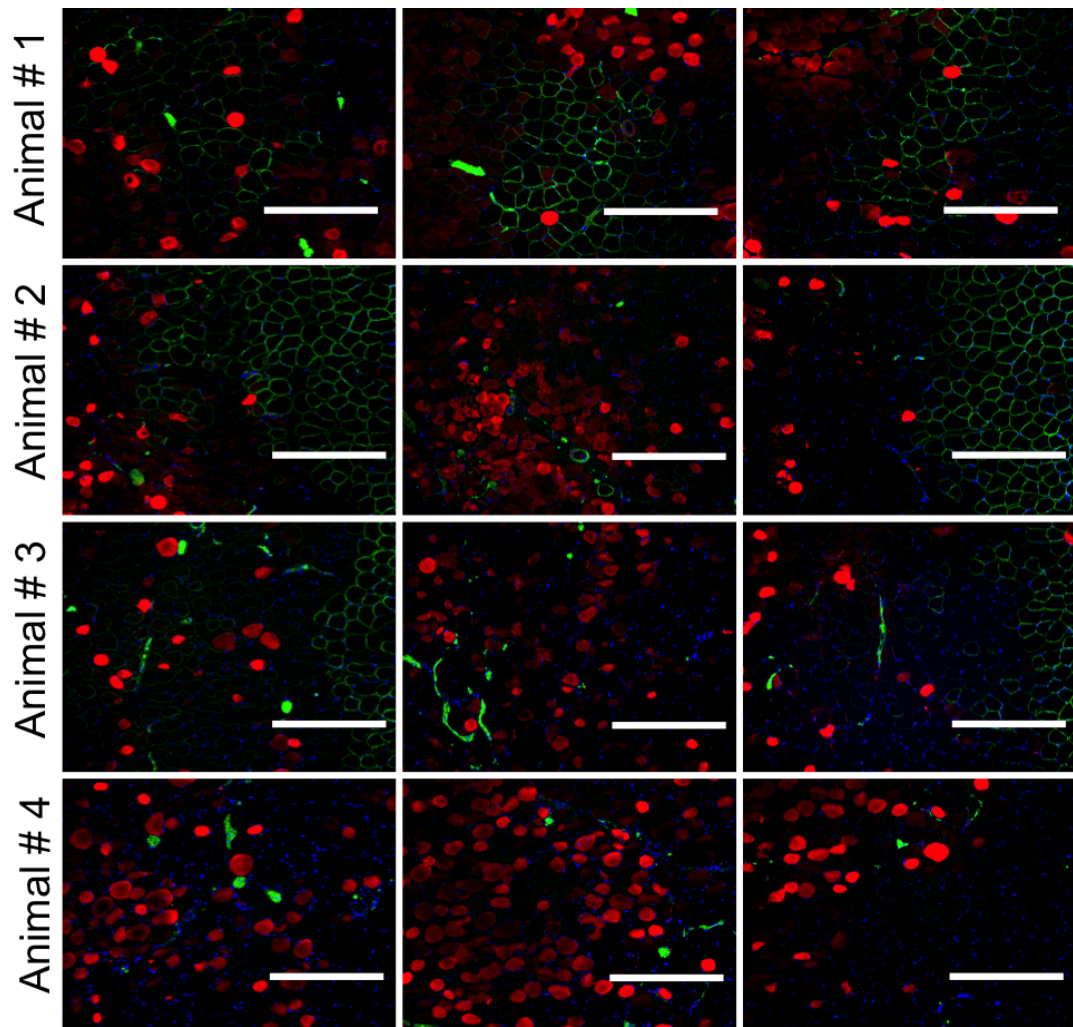

Dapi; Dystrophin; Evans Blue Dye

Supplement: mmc7.pdf [file mmc7.pdf]

**C57BL/6**

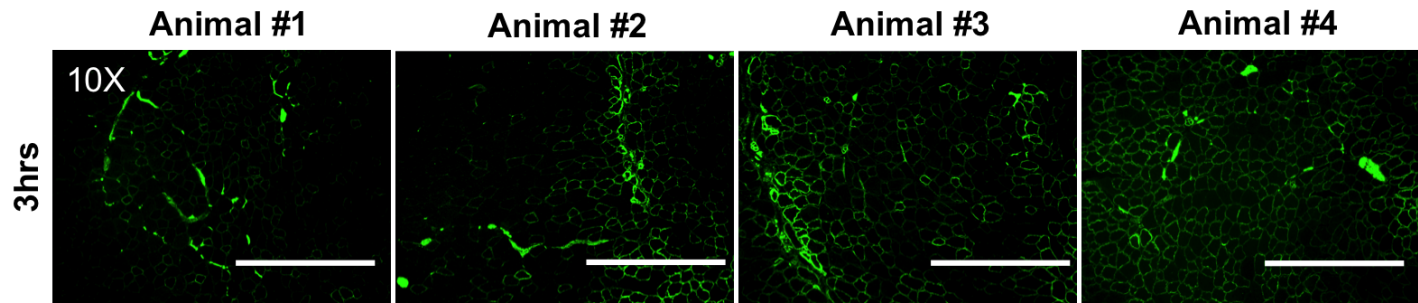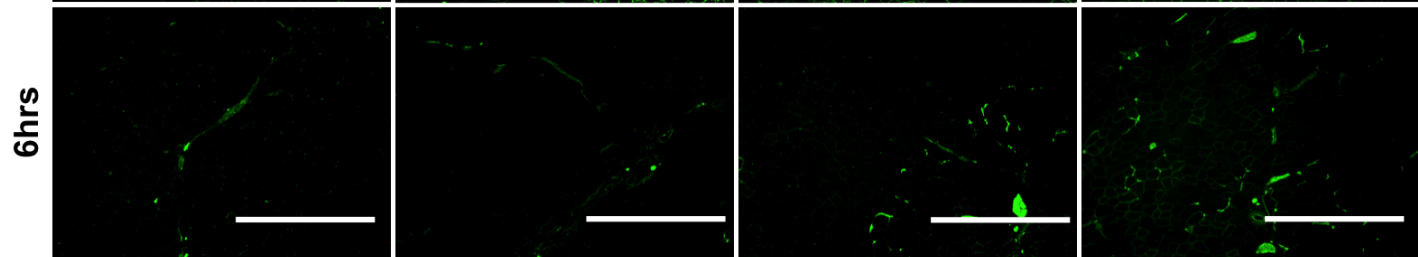

**BALB/c**

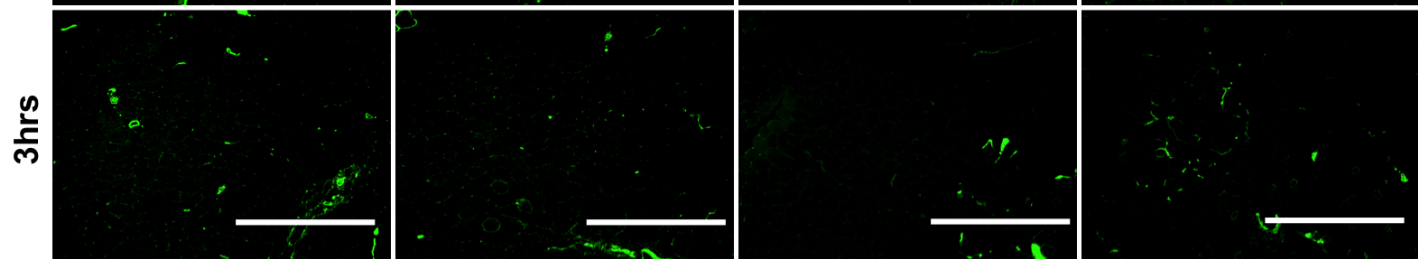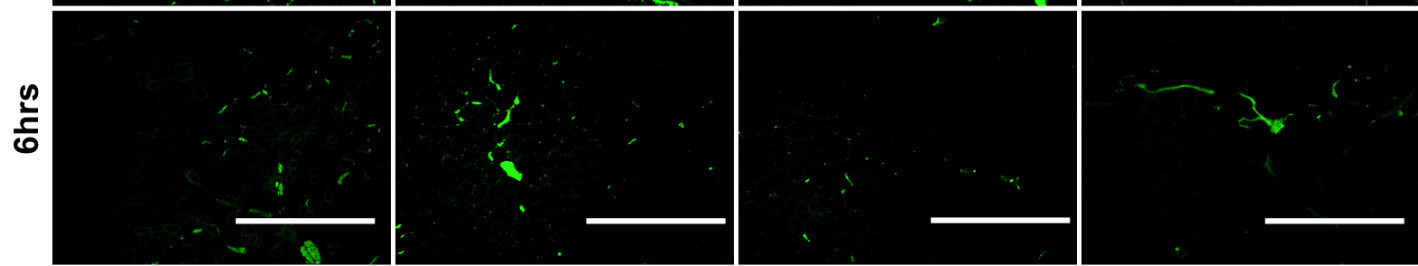

Supplement: mmc8.pdf [file mmc8.pdf]

**Animal #1****Animal #2****Animal #3****Animal #4****129S1/SvlmJ**

20X

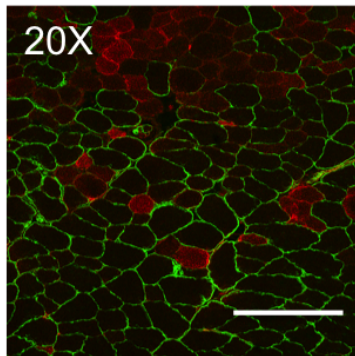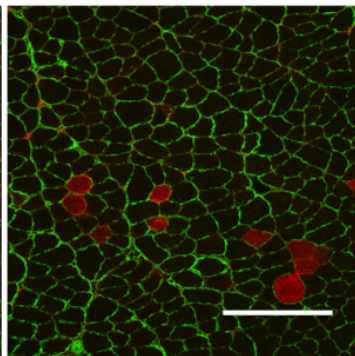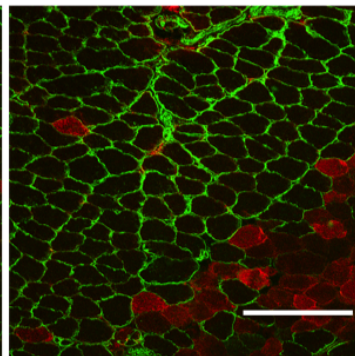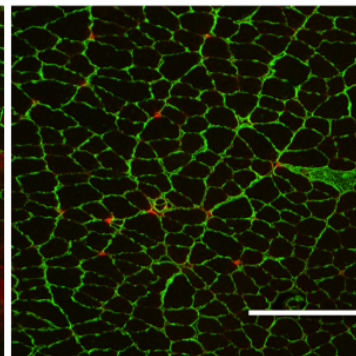**A/J**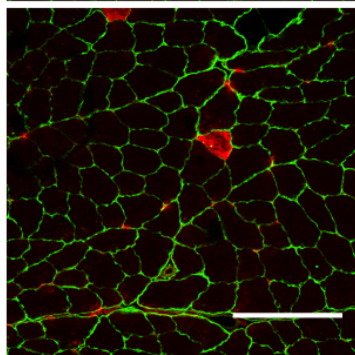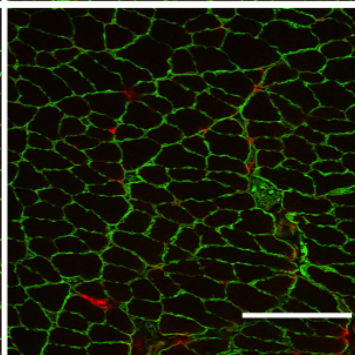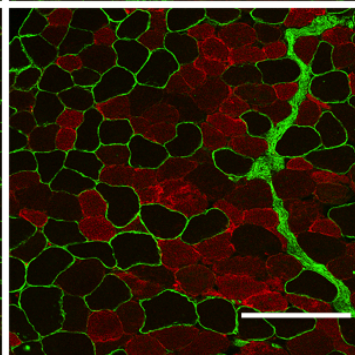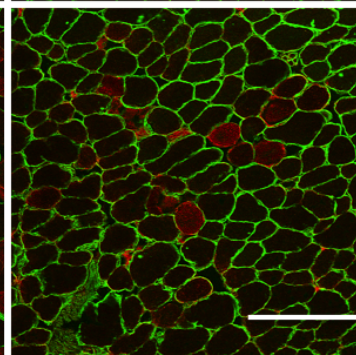

Supplement: mmc9.pdf [file mmc9.pdf]
